# Supplementary material for: California air resources board forest carbon protocol invalidates offsets
Source: PeerJ. 2019 Sep 23;7:e7606. doi: 10.7717/peerj.7606 (PMC6761920; doi:10.7717/peerj.7606)
Supplement: Supplemental Information 5 — CARB-CAR raw data values for annual net forest carbon sequestration are provided for each site as gC m−2 yr−1. [file peerj-07-7606-s005.xlsx]

## Sheet: CARB-CAR gCm-2yr-1, NEE1
	CARB-CAR SITE NAME	tC acre-1 yr-1	gCm-2 yr-1		NEE1 gC m-2 yr-1						CARB-CAR SITE NAME		tC acre-1 yr-1 revised		gC m-2 yr-1 revised				NEE1 gC m-2 yr-1
1	Berry Summit CAR1004	24.9558	6166.49	CARB-CAR	-80.82	1	NEE1	1			Berry Summit CAR1004	2013	30.9	1	7635.29		Mean: -948.8		-80.82	1	NEE1
2	Bishop CAR973	2.38	588.09	63 SITES	108.92	2	59 SITES	2			Bishop CAR973	2013	2.38	2	588.09		St Dev. 1,504		108.92	2	59 SITES
		0.163	40.2767	341 ANNUAL VALUES	-8.74	3	544 ANNUAL VALUES	3				2014	0.163	3	40.2767				-8.74	3	544 ANNUAL VALUES
		0.39	96.3677		-38.42	4	4 MISSING VALUES AS BLANK CELLS	4				2015	0.39	4	96.3677				-38.42	4	4 MISSING VALUES AS BLANK CELLS
		0.497	122.807	MEAN, SD	59.1	5	blank cells counted as values in original data	5				2016	0.497	5	122.807				59.1	5	blank cells counted as values in original data
3	Eddie Ranch CAR1174	32.802	8105.26	-23541.3	-46.9	6		6			Eddie Ranch CAR1174	2017	32.802	6	8105.26				-46.9	6
4	San Juan CAR1262	0.282	69.6812	10039.3	-618.844	7	MEAN, SD	7			San Juan CAR1262	2014	0.08	7	19.7677				-618.844	7	MEAN, SD
		0.471	116.383		-334.63	8	-197.8	8				2015	1.45	8	358.29				-334.63	8	-197.8
		0.563	139.115		242.409	9	261.4	9				2016	1.73	9	427.477				242.409	9	261.4
5	Ejido San Nicolas CAR1306	0.143	35.3348		-446.593	10		10			Ejido San Nicolas CAR1306	2017	0.024	10	5.93032				-446.593	10
		1.189	293.798		-541.331	11		11				2018	0.195	11	48.1838				-541.331	11
6	Greenwood Creek CAR1190	10.45	2582.15		-733.677	12		12			Greenwood Creek CAR1190	2017	10.45	12	2582.15				-733.677	12
7	Alligator CAR497	12.3916	3061.92		-547.073	13		13			Alligator CAR497	2010	12.3916	13	3061.92				-547.073	13
		22.2071	5487.31		-900.186	14		14				2011	22.2071	14	5487.31				-900.186	14
		19.8586	4906.98		-920.282	15		15				2012	19.8586	15	4906.98				-920.282	15
		9.33136	2305.75		-816.932	16		16				2013	9.33136	16	2305.75				-816.932	16
		2.77029	684.53		-802.578	17		17				2014	2.77029	17	684.53				-802.578	17
		2.04034	504.161		67	18		18				2015	2.04259	18	504.716				67	18
		2.17571	537.61		112	19		19				2016	2.1781	19	538.202				112	19
		1.40517	347.212		130	20		20				2017	1.40671	20	347.594				130	20
8	Howland CAR681	21.6061	5338.79		255	21		21			Howland CAR681	2008	21.6061	21	5338.79				255	21
		0.510886	126.238		-9	22		22				2009	0.510886	22	126.238				-9	22
		0.510886	126.238		-112	23		23				2010	0.510886	23	126.238				-112	23
		0.510886	126.238		-143	24		24				2011	0.510886	24	126.238				-143	24
		0.510886	126.238		-578	25		25				2012	0.510886	25	126.238				-578	25
		0.510886	126.238		-170	26		26				2013	0.510886	26	126.238				-170	26
9	Van eck CAR101	72.2368	17849.5		-203	27		27			Van eck CAR101	2004	-7.03209	27	-1737.6				-203	27
		73.6382	18195.7		-246	28		28				2005	7.03209	28	1737.6				-246	28
		75.0382	18541.7		-291	29		29				2006	11.6584	29	2880.76				-291	29
		63.1952	15615.3		-262	30		30				2007	5.13666	30	1269.25				-262	30
		63.1801	15611.6		-190	31		31				2008	9.5428	31	2357.99				-190	31
		71.53	17674.8		-220	32		32				2009	9.26669	32	2289.77				-220	32
		90.8356	22445.2		120	33		33				2010	5.63711	33	1392.91				120	33
		98.2309	24272.5		-480	34		34				2011	0.879854	34	217.409				-480	34
		102.986	25447.4		-600	35		35				2012	4.57509	35	1130.49				-600	35
		104.379	25791.6		-1040	36		36				2013	2.03751	36	503.462				-1040	36
		87.0567	21511.4		-740	37		37				2014	3.43871	37	849.694				-740	37
10	Alder CAR655	5.33886	1319.21		-410	41		41			Alder CAR655	2006	5.33886	38	1319.21				-379	38
		0.129334	31.9579		-276	42		42				2007	0.129334	39	31.9579				-382	39
		0.129334	31.9579		-353	43		43				2008	0.129334	40	31.9579				-399	40
		0.129334	31.9579		-267	44		44				2009	0.129334	41	31.9579				-410	41
		0.129334	31.9579		-355	45		45				2010	0.129334	42	31.9579				-276	42
		0.129334	31.9579		-385	46		46				2011	0.129334	43	31.9579				-353	43
		0.129334	31.9579		36.93	47		47				2012	0.129334	44	31.9579				-267	44
		0.129334	31.9579		-189.79	48		48				2013	0.129334	45	31.9579				-355	45
11	Barnum CAR935	3.7908	936.694		-77.098	49		49			Barnum CAR935	2003	3.7908	46	936.694				-385	46
		2.82457	697.943		-99.939	50		50				2004	2.82457	47	697.943				36.93	47
		2.8314	699.629		-117.21	51		51				2005	2.8314	48	699.629				-189.79	48
		2.8314	699.629		35.214	52		52				2006	2.8314	49	699.629				-77.098	49
		2.8314	699.629		-115.71	53		53				2007	2.8314	50	699.629				-99.939	50
		2.8314	699.629		-240.35	54		54				2008	2.8314	51	699.629				-117.21	51
		2.8314	699.629		nan	55		55				2009	2.8314	52	699.629				35.214	52
		2.8314	699.629		-217.18	56		56				2010	2.8314	53	699.629				-115.71	53
		2.8314	699.629		-118.12	57		57				2011	2.8314	54	699.629				-240.35	54
		2.46382	608.803		-318.24	58		58				2012	2.46382	55	608.803				nan	55
		2.46382	608.803		-281.24	59		59				2013	2.46382	56	608.803				-217.18	56
		2.463	608.599		-226.93	60		60				2014	2.463	57	608.599				-118.12	57
		2.463	608.599		-245.08	61		61				2015	2.463	58	608.599				-318.24	58
		2.463	608.599		-162.9	62		62				2016	2.463	59	608.599				-281.24	59
12	Biedler CAR683	27.0314	6679.36		-300.62	63		63			Biedler CAR683	2007	27.0314	60	6679.36				-226.93	60
		0.509488	125.893		-372.51	64		64				2008	0.509488	61	125.893				-245.08	61
		0.509488	125.893		139	65		65				2009	0.509488	62	125.893				-162.9	62
		0.509488	125.893		111	66		66				2010	0.509488	63	125.893				-300.62	63
		0.509488	125.893		173	67		67				2011	0.509488	64	125.893				-372.51	64
		0.544524	134.55		133	68		68				2012	0.463332	65	114.488				139	65
		1.14737	283.511		113	69		69				2013	0.573999	66	141.833				111	66
		0.970757	239.871		73	70		70				2014	0.969884	67	239.655				173	67
		0.528541	130.601		83	71		71				2015	0.528541	68	130.601				133	68
		0.580299	143.39		23	72		72				2016	0.580299	69	143.39				113	69
		0.693399	171.337		9	73		73				2017	0.693399	70	171.337				73	70
13	Big River CAR408	3.41449	843.708		44	74		74			Big River CAR408	2007	0.821116	71	202.895				83	71
		2.61689	646.623		36	75		75				2008	6.47375	72	1599.64				23	72
		2.18007	538.689		52	76		76				2009	5.27195	73	1302.68				9	73
		5.79078	1430.88		-11	77		77				2010	4.01564	74	992.252				44	74
		0.409649	101.223		-27	78		78				2011	4.15538	75	1026.78				36	75
		1.47419	364.267		-44	79		79				2012	13.3569	76	3300.45				52	76
		2.43793	602.405		2	80		80				2013	3.11452	77	769.587				-11	77
		2.42956	600.337		-54	81		81				2014	3.75042	78	926.717				-27	78
		1.55461	384.139		-49	82		82				2016	1.55461	79	384.139				-44	79
		1.22303	302.205		-84	83		83				2017	1.22303	80	302.205				2	80
14	Brimstone CAR582	2.82064	696.972		-41	84		84			Brimstone CAR582	2007	2.82064	81	696.972				-54	81
		8.46615	2091.96		-24	85		85				2008	8.46615	82	2091.96				-49	82
		0.620526	153.33		-20	86		86				2009	0.620526	83	153.33				-84	83
		0.620526	153.33		-45	87		87				2010	0.620526	84	153.33				-41	84
		0.619908	153.177		-86	88		88				2011	0.619908	85	153.177				-24	85
		0.621144	153.483		-206	89		89				2012	0.621144	86	153.483				-20	86
		0.412561	101.942		nan	90		90				2013	0.412561	87	101.942				-45	87
		2.00473	495.362		-127	91		91				2015	0.54669	88	135.085				-86	88
15	Brosnan CAR658	8.42479	2081.74		-265	92		92			Brosnan CAR658	2010	8.42479	89	2081.74				-206	89
		0.290061	71.673		-119	93		93				2011	0.290061	90	71.673				nan	90
		0.758827	187.504		-125	94		94				2016	0.758827	91	187.504				-127	91
16	Champion CAR645	0.0739093	18.2627		-367	95		95			Champion CAR645	2009	0.0739093	92	18.2627				-265	92
		0.119647	29.5642		-144	96		96				2010	0.119647	93	29.5642				-119	93
		0.130035	32.1313		-104	97		97				2011	0.130035	94	32.1313				-125	94
		0.132093	32.6396		-461	98		98				2012	0.132093	95	32.6396				-367	95
		2.34888	580.4		-488	99		99				2014	2.35146	96	581.039				-144	96
		0.37989	93.8696		nan	100		100				2015	0.380308	97	93.9728				-104	97
		0.121671	30.0644		-353	101		101				2016	0.121804	98	30.0975				-461	98
17	Clifton CAR686	0.277093	68.4687		-432	102		102			Clifton CAR686	2004	0.277093	99	68.4687				-488	99
		0.562438	138.976		-230	103		103				2005	0.562438	100	138.976				nan	100
		0.306077	75.6305		-56	104		104				2006	0.306077	101	75.6305				-353	101
		-0.484812	-119.795		32	105		105				2007	-0.484812	102	-119.795				-432	102
		0.854022	211.026		-78	106		106				2008	0.854022	103	211.026				-230	103
		0.731109	180.654		-113	107		107				2009	0.731109	104	180.654				-56	104
		1.34165	331.518		-158	108		108				2010	1.34165	105	331.518				32	105
		0.440597	108.87		-157	109		109				2011	0.440597	106	108.87				-78	106
		0.461128	113.943		-116	110		110				2012	0.461128	107	113.943				-113	107
		0.473741	117.06		-165	111		111				2013	0.473741	108	117.06				-158	108
		0.489642	120.989		-209	112		112				2014	0.489642	109	120.989				-157	109
		2.08677	515.633		-119	113		113				2016	2.08677	110	515.633				-116	110
18	Cove CAR657	3.10114	766.281		-229	114		114			Cove CAR657	2010	3.10114	111	766.281				-165	111
		0.357677	88.3807		-334	115		115				2011	0.357677	112	88.3807				-209	112
		0.584023	144.31		-331	116		116				2012	0.584023	113	144.31				-119	113
		0.0146255	3.61391		-222	117		117				2013	0.0146255	114	3.61391				-229	114
		2.27872	563.063		-243	118		118				2015	2.27872	115	563.063				-334	115
19	Elk Garden CAR697	0.516429	127.608		-137	119		119			Elk Garden CAR697	2007	0.516429	116	127.608				-331	116
		0.612547	151.358		-196	120		120				2008	0.612547	117	151.358				-222	117
		0.654368	161.692		-185	121		121				2009	0.654368	118	161.692				-243	118
		0.694997	171.731		-234	122		122				2010	0.694997	119	171.731				-137	119
		0.155882	38.5179		-141	123		123				2011	0.155882	120	38.5179				-196	120
		0.752285	185.887		-232	124		124				2012	0.752285	121	185.887				-185	121
		0.77184	190.719		-226	125		125				2013	0.77184	122	190.719				-234	122
		0.813497	201.012		-202	126		126				2014	0.6775	123	167.408				-141	123
		1.78531	441.143		-247	127		127				2016	1.78531	124	441.143				-232	124
20	Garcia CAR102	3.41449	843.708		-186	128		128			Garcia CAR102	2007	3.41449	125	843.708				-226	125
		2.61689	646.623		-161	129		129				2008	2.61689	126	646.623				-202	126
		2.18007	538.689		-182	130		130				2009	2.18007	127	538.689				-247	127
		5.79078	1430.88		-214	131		131				2010	5.79078	128	1430.88				-186	128
		0.409649	101.223		-231	132		132				2011	0.409649	129	101.223				-161	129
		1.47419	364.267		-158	133		133				2012	1.47419	130	364.267				-182	130
		2.43793	602.405		-214	134		134				2013	2.43793	131	602.405				-214	131
		2.42956	600.337		-190	135		135				2014	2.42956	132	600.337				-231	132
		1.17154	289.484		-170	136		136				2016	1.17154	133	289.484				-158	133
		1.80016	444.814		-189	137		137				2017	1.80016	134	444.814				-214	134
21	Green assets CAR749	0.0226037	5.5853		-194	138		138			Green assets CAR749	2007	0.0226037	135	5.5853				-190	135
		3.01192	744.236		-326	139		139				2008	3.01192	136	744.236				-170	136
		3.37675	834.383		-76	140		140				2009	3.37675	137	834.383				-189	137
		3.43965	849.927		-321	141		141				2010	3.43965	138	849.927				-194	138
		0.48323	119.405		-533	142		142				2011	3.6555	139	903.261				-326	139
		3.17044	783.405		-582	143		143				2012	3.68711	140	911.072				-76	140
		3.68711	911.072		-576	144		144				2013	3.68364	141	910.215				-321	141
		3.68364	910.215		-476	145		145				2015	6.09808	142	1506.81				-533	142
22	Gualala CAR660	0.0283844	7.01369		-483	146		146				2016	3.51228	143	867.872				-582	143
		0.396137	97.8842		-291	147		147				2017	3.45875	144	854.644				-576	144
		0.42308	104.542		-291	148		148			Gualala CAR660	2007	0.0283844	145	7.01369				-476	145
		0.451484	111.56		-353	149		149				2008	0.396137	146	97.8842				-483	146
		0.333779	82.4756		-274	150		150				2009	0.42308	147	104.542				-291	147
		0.42863	105.913		-451	151		151				2010	0.451484	148	111.56				-291	148
		0.00296288	0.732118		-149	152		152				2011	0.333779	149	82.4756				-353	149
		0.0626946	15.4916		-149	153		153				2012	0.42863	150	105.913				-274	150
		2.18914	540.928		-486	154		154				2013	0.00296288	151	0.732118				-451	151
		1.67582	414.089		-411	155		155				2014	0.0626946	152	15.4916				-149	152
23	Hershey	5.88525	1454.22		-613	156		156				2016	2.18914	153	540.928				-149	153
		0.48658	120.232		-516	157		157				2017	1.67582	154	414.089				-486	154
		0.48658	120.232		-434	158		158			Hershey	2007	5.88525	155	1454.22				-411	155
		0.48658	120.232		-422	159		159				2008	0.48658	156	120.232				-613	156
		0.48658	120.232		-497	160		160				2009	0.48658	157	120.232				-516	157
		0.48658	120.232		-448	161		161				2010	0.48658	158	120.232				-434	158
		0.48658	120.232		-564	162		162				2011	0.48658	159	120.232				-422	159
		6.09808	1506.81		-573	163		163				2012	0.48658	160	120.232				-497	160
		3.51228	867.872		-698	164		164				2013	0.48658	161	120.232				-448	161
		0.779442	192.598		-395	168		168			Katadin CAR646	2007	0.157275	162	38.8622				-564	162
		0.442833	109.423		-473	169		169				2008	0.784083	163	193.744				-573	163
		0.863035	213.253		-597	170		170				2009	0.779442	164	192.598				-698	164
		0.340677	84.1801		-37	171		171				2010	0.442833	165	109.423				-650	165
25	Lompico CAR590	0.689887	170.469		-79	172		172				2011	0.863035	166	213.253				-559	166
		0.689887	170.469		-63	173		173				2012	0.340677	167	84.1801				-544	167
		0.689887	170.469		10	174		174			Lompico CAR590	2010	0.689887	168	170.469				-395	168
		0.720078	177.929		-40	175		175				2011	0.689887	169	170.469				-473	169
26	Lucchessi CAR694	0.912261	225.417		69	176		176				2012	0.689887	170	170.469				-597	170
		5.99159	1480.5		-107	177		177				2013	0.720078	171	177.929				-37	171
		1.84996	457.118		-119	178		178				2014	0.720078	172	177.929				-79	172
		1.84996	457.118		-170	179		179			Lucchessi CAR694	2010	0.912261	173	225.417				-63	173
		1.84996	457.118		-225	180		180				2011	5.99159	174	1480.5				10	174
		1.84792	456.616		-229	181		181				2012	1.84996	175	457.118				-40	175
		1.84792	456.616		-357	182		182				2013	1.84996	176	457.118				69	176
27	McCloud CAR429	2.63706	651.609		-165	183		183				2014	1.84996	177	457.118				-107	177
		2.10964	521.284		-193	184		184				2015	1.84792	178	456.616				-119	178
		0.594932	147.006		-258	185		185				2016	1.84792	179	456.616				-170	179
		1.39797	345.433		-109	188		188			McCloud CAR429	2007	2.63706	180	651.609				-225	180
		-0.711373	-175.778		134	189		189				2008	2.10964	181	521.284				-229	181
		0.538433	133.045		-101	190		190				2009	0.594932	182	147.006				-357	182
28	Noles North CAR688	5.66201	1399.06		-201	191		191				2010	0.594932	183	147.006				-165	183
		5.92326	1463.62		-68	192		192				2011	0.594903	184	146.998				-193	184
		5.92326	1463.62		-76	193		193				2012	1.39797	185	345.433				-258	185
		5.92326	1463.62		-79	194		194				2013	-0.711373	186	-175.778				-385	186
		5.92326	1463.62		-32	195		195				2014	0.538433	187	133.045				-202	187
		5.92326	1463.62		-32	196		196			Noles North CAR688	2002	5.66201	188	1399.06				-109	188
		5.92326	1463.62		-57	197		197				2003	5.92326	189	1463.62				134	189
		5.92326	1463.62		-59	198		198				2004	5.92326	190	1463.62				-101	190
		5.92714	1464.58		-43	199		199				2005	5.92326	191	1463.62				-201	191
		5.96696	1474.42		-54	200		200				2006	5.92326	192	1463.62				-68	192
		5.82711	1439.86		-317	201		201				2007	5.92326	193	1463.62				-76	193
		5.66201	1399.06		-365	202		202				2008	5.92326	194	1463.62				-79	194
		5.66201	1399.06		-417	203		203				2009	5.92326	195	1463.62				-32	195
		5.65869	1398.24		-309	204		204				2010	5.92714	196	1464.58				-32	196
		5.6975	1407.83		-453	205		205				2011	5.96696	197	1474.42				-57	197
29	Noles South CAR802	3.86435	954.868		-441	206		206				2012	5.82711	198	1439.86				-59	198
		4.88106	1206.09		-416	207		207				2013	5.66201	199	1399.06				-43	199
		4.8819	1206.3		-447	208		208				2014	5.66201	200	1399.06				-54	200
		4.8819	1206.3		-331	209		209				2015	5.65869	201	1398.24				-317	201
		4.8819	1206.3		-32	210		210				2016	5.6975	202	1407.83				-365	202
		4.8819	1206.3		-28	211		211			Noles South CAR802	2003	3.86435	203	954.868				-417	203
		4.8819	1206.3		-36	212		212				2004	4.88106	204	1206.09				-309	204
		4.88358	1206.72		18	213		213				2005	4.8819	205	1206.3				-453	205
		4.89871	1210.45		7	214		214				2006	4.8819	206	1206.3				-441	206
		4.89871	1210.45		-13	215		215				2007	4.8819	207	1206.3				-416	207
		4.86762	1202.77		36	216		216				2008	4.8819	208	1206.3				-447	208
		4.71553	1165.19		76	217		217				2009	4.8819	209	1206.3				-331	209
		4.71203	1164.33		66	218		218				2010	4.88358	210	1206.72				-32	210
		4.73805	1170.76		−629	219		219				2011	4.89871	211	1210.45				-28	211
30	Pocosin Lakes CAR676	-3.12241	-771.538		-59	220		220				2012	4.89871	212	1210.45				-36	212
		5.95063	1470.38		-171	221		221				2013	4.86762	213	1202.77				18	213
		5.96168	1473.11		-197	222		222				2014	4.71553	214	1165.19				7	214
		5.95726	1472.02		-329	223		223				2015	4.71203	215	1164.33				-13	215
		5.95285	1470.93		-198	224		224				2016	4.73805	216	1170.76				36	216
		5.94845	1469.84		-309	225		225			Pocosin Lakes CAR676	2004	2.82342	217	697.657				76	217
		5.94406	1468.76		-290	226		226				2005	5.9309	218	1465.51				66	218
		5.93967	1467.67		-346	227		227				2006	5.9309	219	1465.51				−629	219
		5.93528	1466.59		-44	228		228				2007	5.9309	220	1465.51				-59	220
		5.06629	1251.86		569	229		229				2008	5.9309	221	1465.51				-171	221
		0.722375	178.496		495	230		230				2009	5.9309	222	1465.51				-197	222
31	Potlach CAR648	0.135476	33.4757		153	231		231				2010	5.9309	223	1465.51				-329	223
		1.63911	405.018		117	232		232				2011	5.9309	224	1465.51				-198	224
		0.803644	198.578		103	234		234				2012	5.07003	225	1252.79				-309	225
		0.946013	233.757		28	235		235				2013	0.722375	226	178.496				-290	226
		0.617918	152.686		-49	236		236			Potlach CAR648	2006	0.135476	227	33.4757				-346	227
		0.112322	27.7545		-39	237		237				2007	1.63911	228	405.018				-44	228
32	Pungo River CAR659	0.322273	79.6326		-52	238		238				2008	0.513735	229	126.942				569	229
		7.74521	1913.82		62	239		239				2009	0.803644	230	198.578				495	230
		7.74565	1913.92		258	240		240				2010	0.946013	231	233.757				153	231
		7.74565	1913.92		171	241		241				2011	0.617918	232	152.686				117	232
		7.75231	1915.57		150	243		243				2012	0.112322	233	27.7545				4	233
		7.82689	1934		-98	244		244				2014	1.20569	234	297.921				103	234
		7.82689	1934		-217	245		245			Pungo River CAR659	2003	0.322273	235	79.6326				28	235
		7.71147	1905.48		-178	246		246				2004	7.74521	236	1913.82				-49	236
		7.367	1820.36		-181	247		247				2005	7.74565	237	1913.92				-39	237
		7.31995	1808.74		-148	248		248				2006	7.74565	238	1913.92				-52	238
		6.33582	1565.56		-35	249		249				2007	7.74565	239	1913.92				62	239
		6.32886	1563.84		-64	250		250				2008	7.75231	240	1915.57				258	240
		6.41665	1585.53		-50	251		251				2009	7.82689	241	1934				171	241
33	Rich Mountain CAR696	0.346259	85.5594		22	252		252				2010	7.82689	242	1934				96	242
		0.667259	164.878		-384	253		253				2011	7.71147	243	1905.48				150	243
		0.675995	167.036		-303	254		254				2012	7.367	244	1820.36				-98	244
		0.653823	161.557		-372	255		255				2013	7.31995	245	1808.74				-217	245
		1.37668	340.173		-265	256		256				2014	6.33582	246	1565.56				-178	246
		0.656529	162.226		-250	257		257				2015	6.32886	247	1563.84				-181	247
		0.60682	149.943		-464	258		258				2016	6.41665	248	1585.53				-148	248
		0.866478	214.104		-477	259		259			Rich Mountain CAR696	2002	0.346259	249	85.5594				-35	249
		1.62993	402.75		-553	260		260				2003	0.667259	250	164.878				-64	250
		0.449144	110.982		-564	261		261				2004	0.675995	251	167.036				-50	251
		0.462818	114.361		-320	262		262				2005	0.653823	252	161.557				22	252
		0.478771	118.303		-362	263		263				2006	1.37668	253	340.173				-384	253
		0.494439	122.174		-510	264		264				2007	0.656529	254	162.226				-303	254
		2.43552	601.809		-654	265		265				2008	0.60682	255	149.943				-372	255
34	RPH Ranch CAR430	64.5362	15946.7		-571	266		266				2009	0.866478	256	214.104				-265	256
35	Shanondale CAR780	10.2849	2541.37		-865	267		267				2010	1.62993	257	402.75				-250	257
		0.220292	54.4333		-791	268		268				2011	0.449144	258	110.982				-464	258
36	Sunnybrae CAR575	685.217	169315		-724	269		269				2012	0.462818	259	114.361				-477	259
		36.4158	8998.23		-356	270		270				2013	0.478771	260	118.303				-553	260
		36.4158	8998.23		-619	271		271				2014	0.494439	261	122.174				-564	261
		22.1494	5473.04		-11	272		272				2016	2.43552	262	601.809				-320	262
		22.1494	5473.04		-200	273		273			RPH Ranch CAR430	2010	31.21	263	7711.89				-362	263
		22.1494	5473.04		-70	276		276			Shanondale CAR780	2010	10.2849	264	2541.37				-510	264
		23.1133	5711.23		-55	277		277				2011	0.22	265	54.3613				-654	265
37	Wilitis Woods CAR661	1.53188	378.522		-104	278		278				2012	0.778	266	192.241				-571	266
		1.65152	408.086		-136	279		279				2013	4.14	267	1022.98				-865	267
		1.77788	439.308		-82	280		280			Sunnybrae CAR575	2006	51.0686	268	12618.9				-791	268
		1.91133	472.284		-39	281		281				2007	2.71404	269	670.629				-724	269
		2.05835	508.612		-34	282		282				2008	2.71404	270	670.629				-356	270
		2.20115	543.896		-72	283		283				2009	1.65077	271	407.9				-619	271
		2.35835	582.741		-5	284		284				2010	1.65077	272	407.9				-11	272
		2.5244	623.771		-357	285		285				2011	1.65077	273	407.9				-200	273
		3.0813	761.379		-406	286		286				2012	1.65077	274	407.9				-209	274
		3.06041	756.217		-557	287		287				2013	1.65077	275	407.9				-42	275
		3.23622	799.659		-412	288		288				2014	1.72261	276	425.652				-70	276
		3.29348	813.808		-617	289		289			Wilitis Woods CAR661	2004	1.53188	277	378.522				-55	277
		2.85546	705.575		-600	290		290				2005	1.65152	278	408.086				-104	278
38	Yurok CAR777	16.0129	3956.74		-551	291		291				2006	1.77788	279	439.308				-136	279
		0.402097	99.3567		-488	292		292				2007	1.91133	280	472.284				-82	280
		0.382136	94.4244		-629	293		293				2008	2.05835	281	508.612				-39	281
		0.378074	93.4208		-563	294		294				2009	2.20115	282	543.896				-34	282
39	Rips Redwoods CAR1015	18.7081	4622.7		-359	295		295				2010	2.35835	283	582.741				-72	283
		1.00436	248.174		-296	296		296				2011	2.5244	284	623.771				-5	284
40	Buckeye Forest CAR1013	4.61231	1139.69		-32	297		297				2012	3.0813	285	761.379				-357	285
		1.68448	416.23		-28	298		298				2013	3.06041	286	756.217				-406	286
		1.37654	340.14		-36	299		299				2014	3.23622	287	799.659				-557	287
		1.00352	247.967		18	300		300				2015	3.29348	288	813.808				-412	288
41	Sacramento Canyon CAR 1041	10.8408	2678.74		7	301		301				2016	2.85546	289	705.575				-617	289
		1.00759	248.973		-13	302		302			Yurok CAR777	2011	16.0129	290	3956.74				-600	290
		1.34525	332.406		36	303		303				2012	0.402097	291	99.3567				-551	291
43	USAL car730	10.0256	2477.3		76	304		304				2013	0.382136	292	94.4244				-488	292
		1.50545	371.993		66	305		305				2014	0.378074	293	93.4208				-629	293
		1.55862	385.13		-231	306		306			Rips Redwoods CAR1015	2013	18.7081	294	4622.7				-563	294
		1.61329	398.638		-209	307		307				2014	1.00436	295	248.174				-359	295
		1.6695	412.527		-386	308		308			Buckeye Forest CAR1013	2014	4.61231	296	1139.69				-296	296
		1.7446	431.084		-322	309		309				2015	1.68448	297	416.23				-32	297
		1.80482	445.964		-436	310		310				2016	1.37654	298	340.14				-28	298
		1.88733	466.354		14	311		311				2017	1.00352	299	247.967				-36	299
		1.71167	422.947		127	312		312			Sacramento Canyon CAR 1041	2015	10.8408	300	2678.74				18	300
		1.73412	428.494		67	313		313				2016	1.00759	301	248.973				7	301
		1.62599	401.776		52	314		314				2017	1.34525	302	332.406				-13	302
43	Passamaquody CAR1175	10.5884	2616.36		46	315		315			USAL car730	2007	10.0256	303	2477.3				36	303
		0.34206	84.5219		-398	316		316				2008	1.50545	304	371.993				76	304
44	Buck Mtn CAR1066	6.80839	1682.33		-309	317		317				2009	1.55862	305	385.13				66	305
		0.936585	231.427		-236	318		318				2010	1.61329	306	398.638				-231	306
		0.916579	226.483		-428	319		319				2011	1.6695	307	412.527				-209	307
45	Brushy Mountain CAR1095	22.7518	5621.9		-381	320		320				2012	1.7446	308	431.084				-386	308
		2.99389	739.781		55	321		321				2013	1.80482	309	445.964				-322	309
		1.68271	415.793		7	322		322				2014	1.88733	310	466.354				-436	310
		1.23665	305.572		-47	323		323				2015	1.71167	311	422.947				14	311
46	Va Highlands CAR1032	5.40415	1335.35		190	324		324				2016	1.73412	312	428.494				127	312
47	Sustainable Mtn CAR1067	0.560765	138.563		174	325		325				2017	1.62599	313	401.776				67	313
48	Gabrych Ranch CAR 1104	19.3825	4789.35		200	326		326			Passamaquody CAR1175	2015	10.5884	314	2616.36				52	314
49	Big valley 1092	0.969459	239.55		200	327		327				2016	0.34206	315	84.5219				46	315
50	Glass Ranch CAR1103	32.9693	8146.6		320	328		328			Buck Mtn CAR1066	2015	6.80839	316	1682.33				-398	316
51	Upper Hudson CAR1197	4.4321	1095.16		200	329		329				2016	0.936585	317	231.427				-309	317
52	Silver Lake CAR1204	0.526085	129.994		170	330		330				2017	0.916579	318	226.483				-236	318
53	Wolf River CAR1209	9.05914	2238.48		-367	331		331			Brushy Mountain CAR1095	2014	22.7518	319	5621.9				-428	319
54	Maillard Ranch	20.4531	5053.89		-341	332		332				2015	2.99389	320	739.781				-381	320
55	Apache Tribe	5.47763	1353.5		-267	333		333				2016	1.68271	321	415.793				55	321
56	Molpus Ataya CAR1215	33.4855	8274.14		-384	334		334				2017	1.23665	322	305.572				7	322
57	West Grand Lake CAR 1217	8.35753	2065.12		-422	335		335			Va Highlands CAR1032	2013	5.40415	323	1335.35				-47	323
58	Montesol CAR1102	1.89444	468.111		-602	336		336			Sustainable Mtn CAR1067	2014	0.560765	324	138.563				190	324
59	Ashford CAR1094	24.5829	6074.34		-403	337		337			Gabrych Ranch CAR 1104	2015	19.3825	325	4789.35				174	325
60	Hollow Tree CAR1191	10.9911	2715.86		-432	338		338			Big valley 1092	2016	0.97	326	239.684				200	326
61	Crane Valley CAR1114	5.00888	1237.68		-564	339		339			Glass Ranch CAR1103	2015	32.9693	327	8146.6				200	327
62	Trinity Timberlands CAR1046	19.4303	4801.17		-307	340		340			Upper Hudson CAR1197	2017	4.4321	328	1095.16				320	328
63	Adirondacks CAR1213	3.00992	743.742		-173	341		341			Silver Lake CAR1204	2017	0.526085	329	129.994				200	329
					-523	342		342			Wolf River CAR1209	2017	9.05914	330	2238.48				170	330
					-635	343		343			Maillard Ranch	2016	20.4531	331	5053.89				-367	331
					-712	344		344			Apache Tribe	2016	5.47763	332	1353.5				-341	332
					-547	345		345			Molpus Ataya CAR1215	2017	33.4855	333	8274.14				-267	333
					-561	346		346			West Grand Lake CAR 1217	2015	8.35753	334	2065.12				-384	334
					-700	347		347			Montesol CAR1102	2016	1.89444	335	468.111				-422	335
					-663	348		348			Ashford CAR1094	2014	24.5829	336	6074.34				-602	336
					-640	349		349			Hollow Tree CAR1191	2015	10.9911	337	2715.86				-403	337
					-569	350		350			Crane Valley CAR1114	2017	5.00888	338	1237.68				-432	338
					-818	351		351			Trinity Timberlands CAR1046	2014	19.4303	339	4801.17				-564	339
					-775	352		352			Adirondacks CAR1213	2017	3.00992	340	743.742				-307	340
					-735	353		353											-173	341
					-511	354		354											-523	342
					nan	355		355											-635	343
					-613	356		356											-712	344
					-118	357		357											-547	345
					51	358		358											-561	346
					-114	359		359											-700	347
					-116	360		360											-663	348
					-225	361		361											-640	349
					-174	362		362											-569	350
					-58	363		363											-818	351
					-142	364		364											-775	352
					-19	365		365											-735	353
					-170	366		366											-511	354
					-220	367		367											nan	355
					-150	368		368											-613	356
					-170	369		369											-118	357
					-280	370		370											51	358
					-200	371		371											-114	359
					-210	372		372											-116	360
					-100	373		373											-225	361
					-230	374		374											-174	362
					-220	375		375											-58	363
					-470	376		376											-142	364
					-270	377		377											-19	365
					-260	378		378											-170	366
					-410	379		379											-220	367
					-158	380		380											-150	368
					-153	381		381											-170	369
					-131	382		382											-280	370
					-178	383		383											-200	371
					-271	384		384											-210	372
					-175	385		385											-100	373
					-154	386		386											-230	374
					-221	387		387											-220	375
					-254	388		388											-470	376
					-376	389		389											-270	377
					-251	390		390											-260	378
					-503	391		391											-410	379
					-507	392		392											-158	380
					-466	393		393											-153	381
					-575	394		394											-131	382
					-576	395		395											-178	383
					882	396		396											-271	384
					1269	397		397											-175	385
					885	398		398											-154	386
					528	399		399											-221	387
					237	400		400											-254	388
					-96	401		401											-376	389
					-457	402		402											-251	390
					-527	403		403											-503	391
					-705	404		404											-507	392
					-400	405		405											-466	393
					-385	406		406											-575	394
					-328.6	407		407											-576	395
					-348.5	408		408											882	396
					-325.4	409		409											1269	397
					-534.1	410		410											885	398
					-415.7	411		411											528	399
					-378.9	412		412											237	400
					-437.9	413		413											-96	401
					-376.2	414		414											-457	402
					-241	415		415											-527	403
					-311.2	416		416											-705	404
					-224.4	417		417											-400	405
					-312.8	418		418											-385	406
					-334.1	419		419											-328.6	407
					-562	420		420											-348.5	408
					-421	421		421											-325.4	409
					-423	422		422											-534.1	410
					-532	423		423											-415.7	411
					-457	424		424											-378.9	412
					-523	425		425											-437.9	413
					47	426		426											-376.2	414
					-593	427		427											-241	415
					116	428		428											-311.2	416
					-495	429		429											-224.4	417
					5	430		430											-312.8	418
					-634	431		431											-334.1	419
					53	432		432											-562	420
					-509	433		433											-421	421
					71	434		434											-423	422
					-385	435		435											-532	423
					61	436		436											-457	424
					-478	437		437											-523	425
					-64	438		438											47	426
					-509	439		439											-593	427
					13	440		440											116	428
					47	441		441											-495	429
					125	442		442											5	430
					128	443		443											-634	431
					108	444		444											53	432
					186	445		445											-509	433
					145	446		446											71	434
					122	447		447											-385	435
					42	448		448											61	436
					33	449		449											-478	437
					58	450		450											-64	438
					-79	451		451											-509	439
					87	452		452											13	440
					-293	453		453											47	441
					-435	454		454											125	442
					-372	455		455											128	443
					-419	456		456											108	444
					-400	457		457											186	445
					-267	458		458											145	446
					-332	459		459											122	447
					-419	460		460											42	448
					-404	461		461											33	449
					-382	462		462											58	450
					-135	463		463											-79	451
					-126	464		464											87	452
					-269	465		465											-293	453
					-135	466		466											-435	454
					-245	467		467											-372	455
					-176	468		468											-419	456
					-175	469		469											-400	457
					-119	470		470											-267	458
					-110	471		471											-332	459
					-26	472		472											-419	460
					-61	473		473											-404	461
					-64	474		474											-382	462
					-94	475		475											-135	463
					-233	476		476											-126	464
					-96	477		477											-269	465
					-114	478		478											-135	466
					-48	479		479											-245	467
					-147	480		480											-176	468
					-80	481		481											-175	469
					-167	482		482											-119	470
					-396	483		483											-110	471
					-33	484		484											-26	472
					32	485		485											-61	473
					46	486		486											-64	474
					316	487		487											-94	475
					-167	488		488											-233	476
					-158	489		489											-96	477
					-80	490		490											-114	478
					-172	491		491											-48	479
					-177	492		492											-147	480
					-179	493		493											-80	481
					5	494		494											-167	482
					-82	495		495											-396	483
					49	496		496											-33	484
					-114	497		497											32	485
					114	498		498											46	486
					-71	499		499											316	487
					133	500		500											-167	488
					-26	501		501											-158	489
					-55	502		502											-80	490
					262	503		503											-172	491
					-28	504		504											-177	492
					76	505		505											-179	493
					-70	506		506											5	494
					84	507		507											-82	495
					-470	508		508											49	496
					-576	509		509											-114	497
					-618	510		510											114	498
					-592	511		511											-71	499
					-629	512		512											133	500
					44	513		513											-26	501
					-217	514		514											-55	502
					-42	515		515											262	503
					-30	516		516											-28	504
					-98	517		517											76	505
					100	518		518											-70	506
					-9	519		519											84	507
					13	520		520											-470	508
					-114	521		521											-576	509
					-67	522		522											-618	510
					-111	523		523											-592	511
					-27	524		524											-629	512
					-4	525		525											44	513
					-71	526		526											-217	514
					-12	527		527											-42	515
					134	528		528											-30	516
					29	529		529											-98	517
					79	530		530											100	518
					36	531		531											-9	519
					33	532		532											13	520
					32	533		533											-114	521
					94	534		534											-67	522
					205	535		535											-111	523
					154	536		536											-27	524
					23	537		537											-4	525
					41	538		538											-71	526
					-7	539		539											-12	527
					14	540		540											134	528
					-2	541		541											29	529
					8	542		542											79	530
					62	543		543											36	531
					17	544		544											33	532
																			32	533
																			94	534
																			205	535
																			154	536
																			23	537
																			41	538
																			-7	539
																			14	540
																			-2	541
																			8	542
																			62	543
																			17	544

## Sheet: CARB-CAR ANNUAL DATA
	CARB-CAR gCm-2yr-1 (n=340)		SUPPLEMENT 4: TABLE 1 CARB-CAR ANNUAL DATA
	SITE NAME^, CODE	2001	2002	2003	2004	2005	2006	2007	2008	2009	2010	2011	2012	2013	2014	2015	2016	2017	2018
	Berry Summit CAR1004													-7635.29
	Bishop CAR973													-588.09	-40.2767	-96.3677	-122.807
	Eddie Ranch CAR1174																	-8105.26
	San Juan CAR1262														-19.7677	-358.29	-427.477
	Ejido San Nicolas CAR1306																	-5.93032	-48.1838
	Greenwood Creek CAR1190																	-2582.15
	Alligator CAR497										-3061.92	-5487.31	-4906.98	-2305.75	-684.53	-504.716	-538.202	-347.594
	Howland CAR681								-5338.79	-126.238	-126.238	-126.238	-126.238	-126.238
	Van eck CAR101				1737.6	-1737.6	-2880.76	-1269.25	-2357.99	-2289.77	-1392.91	-217.409	-1130.49	-503.462	-849.694
	Alder CAR655				0	0	-1319.21	-31.9579	-31.9579	-31.9579	-31.9579	-31.9579	-31.9579	-31.9579
	Barnum CAR935			-936.694	-697.943	-699.629	-699.629	-699.629	-699.629	-699.629	-699.629	-699.629	-608.803	-608.803	-608.599	-608.599	-608.599
	Biedler CAR683							-6679.36	-125.893	-125.893	-125.893	-125.893	-114.488	-141.833	-239.655	-130.601	-143.39	-171.337
	Big River CAR408							-202.895	-1599.64	-1302.68	-992.252	-1026.78	-3300.45	-769.587	-926.717		-384.139	-302.205
	Brimstone CAR582							-696.972	-2091.96	-153.33	-153.33	-153.177	-153.483	-101.942		-135.085
	Brosnan CAR658										-2081.74	-71.673					-187.504
	Champion CAR645									-18.2627	-29.5642	-32.1313	-32.6396		-581.039	-93.9728	-30.0975
	Clifton CAR686				-68.4687	-138.976	-75.6305	119.795	-211.026	-180.654	-331.518	-108.87	-113.943	-117.06	-120.989		-515.633
	Cove CAR657										-766.281	-88.3807	-144.31	-3.61391		-563.063
	Elk Garden CAR697							-127.608	-151.358	-161.692	-171.731	-38.5179	-185.887	-190.719	-167.408		-441.143
	Garcia CAR102							-843.708	-646.623	-538.689	-1430.88	-101.223	-364.267	-602.405	-600.337		-289.484	-444.814
	Green assets CAR749							-5.5853	-744.236	-834.383	-849.927	-903.261	-911.072	-910.215	0	-1506.81	-867.872	-854.644
	Gualala CAR660							-7.01369	-97.8842	-104.542	-111.56	-82.4756	-105.913	-0.732118	-15.4916		-540.928	-414.089
	Hershey							-1454.22	-120.232	-120.232	-120.232	-120.232	-120.232	-120.232
	Katadin CAR646							-38.8622	-193.744	-192.598	-109.423	-213.253	-84.1801
	Lompico CAR590										-170.469	-170.469	-170.469	-177.929	-177.929
	Lucchessi CAR694										-225.417	-1480.5	-457.118	-457.118	-457.118	-456.616	-456.616
	McCloud CAR429							-651.609	-521.284	-147.006	-147.006	-146.998	-345.433	175.778	-133.045
	Noles North CAR688		-1399.06	-1463.62	-1463.62	-1463.62	-1463.62	-1463.62	-1463.62	-1463.62	-1464.58	-1474.42	-1439.86	-1399.06	-1399.06	-1398.24	-1407.83
	Noles South CAR802			-954.868	-1206.09	-1206.3	-1206.3	-1206.3	-1206.3	-1206.3	-1206.72	-1210.45	-1210.45	-1202.77	-1165.19	-1164.33	-1170.76
	Pocosin Lakes CAR676				-697.657	-1465.51	-1465.51	-1465.51	-1465.51	-1465.51	-1465.51	-1465.51	-1252.79	-178.496
	Potlach CAR648						-33.4757	-405.018	-126.942	-198.578	-233.757	-152.686	-27.7545		-297.921
	Pungo River CAR659			-79.6326	-1913.82	-1913.92	-1913.92	-1913.92	-1915.57	-1934	-1934	-1905.48	-1820.36	-1808.74	-1565.56	-1563.84	-1585.53
	Rich Mountain CAR696		-85.5594	-164.878	-167.036	-161.557	-340.173	-162.226	-149.943	-214.104	-402.75	-110.982	-114.361	-118.303	-122.174		-601.809
	RPH Ranch CAR430										-7711.89
	Shanondale CAR780										-2541.37	-54.4333	-192.241	-101.656
	Sunnybrae CAR575						-12618.9	-670.629	-670.629	-407.9	-407.9	-407.9	-407.9	-407.9	-425.652
	Willitis Woods CAR				-378.522	-408.086	-439.308	-472.284	-508.612	-543.896	-582.741	-623.771	-761.379	-756.217	-799.659	-813.808	-705.575
	Yurok CAR777											-3956.74	-99.3567	-94.4244	-93.4208
	Rips Redwoods CAR1015													-4622.7	-248.174
	Buckeye Forest CAR1013														-1139.69	-416.23	-340.14	-247.967
	Sacramento Canyon CAR 1041															-2678.74	-248.973	-332.406
	USAL car730							-2477.3	-371.993	-385.13	-398.638	-412.527	-431.084	-445.964	-466.354	-422.947	-428.494	-401.776
	Passamaquody CAR1175															-2616.36	-84.5219	0
	Buck Mtn CAR1066															-1682.33	-231.427	-226.483
	Brushy Mountain CAR1095														-5621.9	-739.781	-415.793	-305.572
	Va Highlands CAR1032													-1335.35
	Sustainable Mtn CAR1067														-138.563
	Gabrych Ranch CAR 1104															-4789.35
	Big valley 1092																-239.55
	Glass Ranch CAR1103															-8146.6
	Upper Hudson CAR1197																	-1095.16
	Silver Lake CAR1204																	-129.994
	Wolf River CAR1209																	-2238.48
	Maillard Ranch CAR1180																-5053.89
	Apache Tribe CAR1183																-1353.5
	Molpus Ataya CAR1215																	-8274.14
	West Grand Lake CAR 1217															-2065.12
	Montesol CAR1102																-468.111
	Ashford CAR1094														-6074.34
	Hollow Tree CAR1191																-2715.86
	Crane Valley CAR1114																	-1237.68
	Trinity Timberlands CAR1046														-4801.17
	Adirondacks CAR1213																	-743.742
	^SITE NAME, CODE, LINKS TO WEBPAGE, SUPPLEMENT 3
	See Methods section for data sources

## Sheet: NEE1 ANNUAL DATA
	NEE1 gCm-2yr-1 (n=544)			SUPPLEMENT 4: TABLE 2 NEE ANNUAL DATA
	SITE NAME^, CODE	1992	1993	1994	1995	1996	1997	1998	1999	2000	2001	2002	2003	2004	2005	2006	2007	2008	2009	2010	2011	2012	2013	2014	2015
	Austria (AT-Neu)										-80.82	108.92	-8.74	-38.42	59.1	-46.9										1
	Australia (Au-Tum)										-618.844	-334.63	242.409	-446.593	-541.331	-733.677	-547.073	-900.186	-920.282	-816.932	-802.578					2
	Belgium (BE-Bra)						67	112	130	255	-9	-112	-143	-578	-170	-203	-246	-291	-262							3
	Brazil (BR-Ji2)													-190	-220	120	-480	-600	-1040	-740						4
	Canada- BC (CA-Ca1)							-379	-382	-399	-410	-276	-353	-267	-355	-385										5
	Canada- Ontario (CA-Gro)					36.93	-189.79	-77.098	-99.939	-117.21	35.214	-115.71	-240.35	nan	-217.18	-118.12	-318.24	-281.24	-226.93	-245.08	-162.9	-300.62	-372.51			6
	Canada- Quebec CA-Qfo)											139	111	173	133	113	73	83	23	9						7
	Canada- Manitoba (CA-Man)			44	36	52	-11	-27	-44	2	-54	-49	-84	-41	-24	-20	-45	-86								8
	Canada- Sask (CA-Obs)				-206	nan	-127	-265	-119	-125	-367	-144	-104													9
	China (CN-Di)												-461	-488	nan	-353	-432	-230								10
	Denmark (DK-Sor)						-56	32	-78	-113	-158	-157	-116	-165	-209	-119	-229	-334	-331							11
	Finland - Hyt (FI-Hyt)						-222	-243	-137	-196	-185	-234	-141	-232	-226	-202	-247									12
	Finland - Mek (FI-Mek)								-186	-161	-182	-214	-231	-158	-214	-190	-170	-189								13
	France - Hes (FR-Hes)				-194	-326	-76	-321	-533	-582	-576	-476	-483	-291												14
	France - Pue (FR-Pue)										-291	-353	-274	-451	-149	-149										15
	Germany - Hai (DE-Hai)												-486	-411	-613	-516	-434	-422	-497							16
	Germany - Thr (DE-Hai)					-448	-564	-573	-698	-650	-559	-544	-395	-473	-597											17
	Hungary (HE-Heg)						-37	-79	-63		10	-40	69	-107												18
	Ireland - Cork (IE-Cor)											-193	-258	-385	-202	-109	134	-101	-201							19
	Ireland - Glencar (IE-Gle)												-68	-76	-79	-32	-32	-57	-59	-43	-54					20
	Israel (IL-Yat)									-119	-170	-225	-229	-357	-165											21
	Japan - Fuj (JP-Fuj)									-317	-365	-417	-309	-453	-441	-416	-447	-331								22
	Japan - Kiryu (JP-Wat)												-32	-28	-36	18	7	-13	36	76	66					23
	Japan - Tak (JP-Tak)			-629	-59	-171	-197	-329	-198	-309	-290	-346														24
	Japan - Teshio (JP-Tef)											-44	569	495	153	117	4	103	28	-49						25
	Mexico (Mx-Lpa)											-39	-52	62	258	171	96	150								26
	Netherlands (NL-Loo						-384	-303	-372	-265	-250	-464	-477	-553	-564	-320	-362	-510	-654	-571						27
	Portugal (PT-Esp)											-865	-791	-724	-356	-619	-11	-200	-209							28
	UK - Auc (UK-Amo)												-42	-70	-55	-104	-136	-82	-39	-34	-72	-5				29
	UK - Sti (UK-Stra)								-357	-406	-557	-412	-617	-600	-551	-488	-629	-563	-359	-296						30
	US - Alaska (US-Uaf)												-32	-28	-36	18	7	-13	36	76	66					31
	US - Alaska - Ics (US-ICs)																	29	79	36	33	32	94	205	154	32
	US - Alaska - Ich (US-ICh)																	23	41	-7	14	-2	8	62	17	33
	US - Arizona - Fmf (US-Fmf)															-118	51	-114	-116	-225						34
	US - Arizona - Fuf (US-Fuf)															-174	-58	-142	-19	-170						35
	US - Arizona SRM* (US-Fvf)												-293	-435	-372	-419	-400									36
	US - Arizona SRM* (US-Fvf)												-267	-332	-419	-404	-382									36
	US - Arizona SRM* (US-Fvf)												-135	-126	-269	-135	-245									36
	US - CA - Ton (US-Ton)											-176	-175	-119	-110	-26	-61	-64	-94	-233	-96	-114	-48	-147	-80	37
	US - CA - TWT (US-TwT)																		-167	-396	-33	32	46	316		38
	US - CA - Var (US-Var)										-179	5	-82	49	-114	114	-71	133	-26	-55	262	-28	76	-70	84	39
	US - Florida (US-SP3)								-700	-663	-640	-569	-818	-775	-735	-511	nan	-613								40
	US - Florida - Miz (US-SP2)								882	1269	885	528	237	-96	-457	-527	-705	-400	-385							41
	US - Indiana (US-MMS)										-328.6	-348.5	-325.4	-534.1	-415.7	-378.9	-437.9	-376.2	-241	-311.2	-224.4	-312.8	-334.1			42
	US - Iowa - Br1 (US-Br1)															14	-231	127	-209	67	-386	52	-322	46	-436	43
	US - Iowa - Br3 (US-Br3)															-398	55	-309	7	-236	-47	-428	190	-381	174	44
	US - Iowa (US-Br2)																-98	-217	-178	-181	-148	-35	-64	-50	22	45
	US - Maine (US-Ho1)					-158	-153	-131	-178	-271	-175	-154	-221	-254												46
	US - Mass (US-Ha1)	-220	-150	-170	-280	-200	-210	-100	-230	-220	-470	-270	-260	-410												47
	US - New Mexico (US-Seg)																42	33	58	-79	87					48
	US - Michigan (US-UND)								-167	-158	-80	-172	-177													49
	US - Missouri (US-Moz)														-562	-421	-423	-532	-457							50
	US - NC - Dk1 (US-Dk1)										200	200	320	200	170											51
	US - NC - Dk2 (US-Dk2)										-367	-341	-267	-384	-422	-602	-403	-432								52
	US - NC - Dk3 (US-Dk3)										-564	-307	-173	-523	-635	-712	-547	-561								53
	US - Nebraska 1 (US-Ne2)										-523	47	-593	116	-495	5	-634	53								54
	US - Nebraska 2 (US-Ne2)										-509	71	-385	61	-478	-64	-509	13								55
	US - Oregon (US-Me2)											-376	-251	-503	-507	-466	-575	-576								56
	US - Tennessee (US-ChR)				-470	-576	-618	-592	-629																	57
	US - Washington (US-Wrc)							44	-217	-42	-30	-98	100	-9	13	-114	-67	-111	-27	-4	-71	-12	134			58
	US - Wisconsin US-Pla)						47	125	128	108	186	145	122													59
	^SITE NAME, CODE, LINKS TO WEBPAGE, SUPPLEMENT 3
	US - Arizona SRM*	These data are reported as an aggregate value in NEE1, -309
		Here we reoort individual years cited in Dore et al. (2013) in NEE1.
		The avereage of the individual annual values = -308.9, consistent with the value reported in NEE1 of -309.
		US-Arizona SRMT is considered a single site entity.
	4 missing values (yellow cells) were included in the NEE1 data set of 544.
		Data appear in published works cited in:
			Baldocchi, D., Chu, H. & Reichstein, M. Inter-annual variability of net and gross ecosystem carbon fluxes: A review. Agric. For. Meteorol. 249, 520–533 (2018).
