# Supplementary material for: California air resources board forest carbon protocol invalidates offsets
Source: PeerJ. 2019 Sep 23;7:e7606. doi: 10.7717/peerj.7606 (PMC6761920; doi:10.7717/peerj.7606)
Supplement: Supplemental Information 7 — All raw data annual values for CARB-CAR and NEE2 sites are combined in a single file. [file peerj-07-7606-s007.xlsx]

## Sheet: data
SUPPLEMENT 4. SUMMARY DATA CARB-CAR, NEE1
CARB-CAR		NEE1				CARB-CAR		NEE1
gC m-2 yr-1		gC m-2 yr-1				Mean	-948.767	Mean	-198.017
-7635.29		-80.82				Std	1504.83	Std	261.554
-588.09		108.92				n1	340	n2	540
-40.2767		-8.74							(NB: 4 missing values)
-96.3677		-38.42
-122.807		59.1
-8105.26		-46.9
-19.7677		-618.844
-358.29		-334.63
-427.477		242.409
-5.93032		-446.593
-48.1838		-541.331
-2582.15		-733.677
-3061.92		-547.073
-5487.31		-900.186
-4906.98		-920.282
-2305.75		-816.932
-684.53		-802.578
-504.716		67
-538.202		112
-347.594		130
-5338.79		255
-126.238		-9
-126.238		-112
-126.238		-143
-126.238		-578
-126.238		-170
1737.6		-203
-1737.6		-246
-2880.76		-291
-1269.25		-262
-2357.99		-190
-2289.77		-220
-1392.91		120
-217.409		-480
-1130.49		-600
-503.462		-1040
-849.694		-740
-1319.21		-379
-31.9579		-382
-31.9579		-399
-31.9579		-410
-31.9579		-276
-31.9579		-353
-31.9579		-267
-31.9579		-355
-936.694		-385
-697.943		36.93
-699.629		-189.79
-699.629		-77.098
-699.629		-99.939
-699.629		-117.21
-699.629		35.214
-699.629		-115.71
-699.629		-240.35
-608.803		nan
-608.803		-217.18
-608.599		-118.12
-608.599		-318.24
-608.599		-281.24
-6679.36		-226.93
-125.893		-245.08
-125.893		-162.9
-125.893		-300.62
-125.893		-372.51
-114.488		139
-141.833		111
-239.655		173
-130.601		133
-143.39		113
-171.337		73
-202.895		83
-1599.64		23
-1302.68		9
-992.252		44
-1026.78		36
-3300.45		52
-769.587		-11
-926.717		-27
-384.139		-44
-302.205		2
-696.972		-54
-2091.96		-49
-153.33		-84
-153.33		-41
-153.177		-24
-153.483		-20
-101.942		-45
-135.085		-86
-2081.74		-206
-71.673		nan
-187.504		-127
-18.2627		-265
-29.5642		-119
-32.1313		-125
-32.6396		-367
-581.039		-144
-93.9728		-104
-30.0975		-461
-68.4687		-488
-138.976		nan
-75.6305		-353
119.795		-432
-211.026		-230
-180.654		-56
-331.518		32
-108.87		-78
-113.943		-113
-117.06		-158
-120.989		-157
-515.633		-116
-766.281		-165
-88.3807		-209
-144.31		-119
-3.61391		-229
-563.063		-334
-127.608		-331
-151.358		-222
-161.692		-243
-171.731		-137
-38.5179		-196
-185.887		-185
-190.719		-234
-167.408		-141
-441.143		-232
-843.708		-226
-646.623		-202
-538.689		-247
-1430.88		-186
-101.223		-161
-364.267		-182
-602.405		-214
-600.337		-231
-289.484		-158
-444.814		-214
-5.5853		-190
-744.236		-170
-834.383		-189
-849.927		-194
-903.261		-326
-911.072		-76
-910.215		-321
-1506.81		-533
-867.872		-582
-854.644		-576
-7.01369		-476
-97.8842		-483
-104.542		-291
-111.56		-291
-82.4756		-353
-105.913		-274
-0.732118		-451
-15.4916		-149
-540.928		-149
-414.089		-486
-1454.22		-411
-120.232		-613
-120.232		-516
-120.232		-434
-120.232		-422
-120.232		-497
-120.232		-448
-38.8622		-564
-193.744		-573
-192.598		-698
-109.423		-650
-213.253		-559
-84.1801		-544
-170.469		-395
-170.469		-473
-170.469		-597
-177.929		-37
-177.929		-79
-225.417		-63
-1480.5		10
-457.118		-40
-457.118		69
-457.118		-107
-456.616		-119
-456.616		-170
-651.609		-225
-521.284		-229
-147.006		-357
-147.006		-165
-146.998		-193
-345.433		-258
175.778		-385
-133.045		-202
-1399.06		-109
-1463.62		134
-1463.62		-101
-1463.62		-201
-1463.62		-68
-1463.62		-76
-1463.62		-79
-1463.62		-32
-1464.58		-32
-1474.42		-57
-1439.86		-59
-1399.06		-43
-1399.06		-54
-1398.24		-317
-1407.83		-365
-954.868		-417
-1206.09		-309
-1206.3		-453
-1206.3		-441
-1206.3		-416
-1206.3		-447
-1206.3		-331
-1206.72		-32
-1210.45		-28
-1210.45		-36
-1202.77		18
-1165.19		7
-1164.33		-13
-1170.76		36
-697.657		76
-1465.51		66
-1465.51		−629
-1465.51		-59
-1465.51		-171
-1465.51		-197
-1465.51		-329
-1465.51		-198
-1252.79		-309
-178.496		-290
-33.4757		-346
-405.018		-44
-126.942		569
-198.578		495
-233.757		153
-152.686		117
-27.7545		4
-297.921		103
-79.6326		28
-1913.82		-49
-1913.92		-39
-1913.92		-52
-1913.92		62
-1915.57		258
-1934		171
-1934		96
-1905.48		150
-1820.36		-98
-1808.74		-217
-1565.56		-178
-1563.84		-181
-1585.53		-148
-85.5594		-35
-164.878		-64
-167.036		-50
-161.557		22
-340.173		-384
-162.226		-303
-149.943		-372
-214.104		-265
-402.75		-250
-110.982		-464
-114.361		-477
-118.303		-553
-122.174		-564
-601.809		-320
-7711.89		-362
-2541.37		-510
-54.3613		-654
-192.241		-571
-1022.98		-865
-12618.9		-791
-670.629		-724
-670.629		-356
-407.9		-619
-407.9		-11
-407.9		-200
-407.9		-209
-407.9		-42
-425.652		-70
-378.522		-55
-408.086		-104
-439.308		-136
-472.284		-82
-508.612		-39
-543.896		-34
-582.741		-72
-623.771		-5
-761.379		-357
-756.217		-406
-799.659		-557
-813.808		-412
-705.575		-617
-3956.74		-600
-99.3567		-551
-94.4244		-488
-93.4208		-629
-4622.7		-563
-248.174		-359
-1139.69		-296
-416.23		-32
-340.14		-28
-247.967		-36
-2678.74		18
-248.973		7
-332.406		-13
-2477.3		36
-371.993		76
-385.13		66
-398.638		-231
-412.527		-209
-431.084		-386
-445.964		-322
-466.354		-436
-422.947		14
-428.494		127
-401.776		67
-2616.36		52
-84.5219		46
-1682.33		-398
-231.427		-309
-226.483		-236
-5621.9		-428
-739.781		-381
-415.793		55
-305.572		7
-1335.35		-47
-138.563		190
-4789.35		174
-239.684		200
-8146.6		200
-1095.16		320
-129.994		200
-2238.48		170
-5053.89		-367
-1353.5		-341
-8274.14		-267
-2065.12		-384
-468.111		-422
-6074.34		-602
-2715.86		-403
-1237.68		-432
-4801.17		-564
-743.742		-307
		-173
		-523
		-635
		-712
		-547
		-561
		-700
		-663
		-640
		-569
		-818
		-775
		-735
		-511
		nan
		-613
		-118
		51
		-114
		-116
		-225
		-174
		-58
		-142
		-19
		-170
		-220
		-150
		-170
		-280
		-200
		-210
		-100
		-230
		-220
		-470
		-270
		-260
		-410
		-158
		-153
		-131
		-178
		-271
		-175
		-154
		-221
		-254
		-376
		-251
		-503
		-507
		-466
		-575
		-576
		882
		1269
		885
		528
		237
		-96
		-457
		-527
		-705
		-400
		-385
		-328.6
		-348.5
		-325.4
		-534.1
		-415.7
		-378.9
		-437.9
		-376.2
		-241
		-311.2
		-224.4
		-312.8
		-334.1
		-562
		-421
		-423
		-532
		-457
		-523
		47
		-593
		116
		-495
		5
		-634
		53
		-509
		71
		-385
		61
		-478
		-64
		-509
		13
		47
		125
		128
		108
		186
		145
		122
		42
		33
		58
		-79
		87
		-293
		-435
		-372
		-419
		-400
		-267
		-332
		-419
		-404
		-382
		-135
		-126
		-269
		-135
		-245
		-176
		-175
		-119
		-110
		-26
		-61
		-64
		-94
		-233
		-96
		-114
		-48
		-147
		-80
		-167
		-396
		-33
		32
		46
		316
		-167
		-158
		-80
		-172
		-177
		-179
		5
		-82
		49
		-114
		114
		-71
		133
		-26
		-55
		262
		-28
		76
		-70
		84
		-470
		-576
		-618
		-592
		-629
		44
		-217
		-42
		-30
		-98
		100
		-9
		13
		-114
		-67
		-111
		-27
		-4
		-71
		-12
		134
		29
		79
		36
		33
		32
		94
		205
		154
		23
		41
		-7
		14
		-2
		8
		62
		17
